# Supplementary material for: HALC: High throughput algorithm for long read error correction
Source: PubMed Central journal article supplement (PMC5382505; doi:10.1186/s12859-017-1610-3), 2017-04-05
Supplement: 12859_2017_1610_MOESM1_ESM.pdf [file 12859_2017_1610_MOESM1_ESM.pdf]

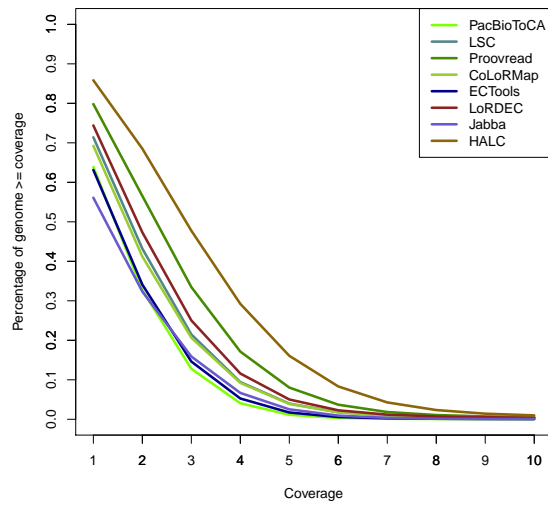

**Fig. S1** Percentage of genome above various long read coverages on the *A. thaliana* data. The percentage of genome bases (y-axis) is plotted with long read coverage from 1x to 10x (x-axis), corresponding to the error correction results by different algorithms in Table 2(b).

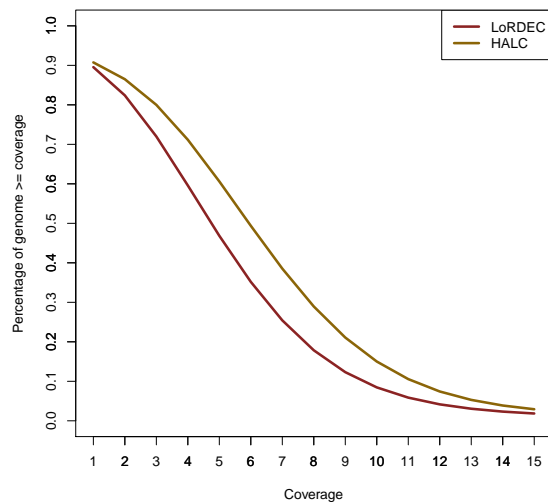

**Fig. S2** Percentage of genome above various long read coverages on the *Maylandia zebra* data. The percentage of genome bases (y-axis) is plotted with long read coverage from 1x to 15x (x-axis), corresponding to the error correction results by different algorithms in Table 2(c).

**Table S1** Data sets used in the evaluation.

|                      |                     | <i>E. coli</i>      | <i>A. thaliana</i>                  | <i>Maylandia Zebra</i>              | <i>S. cerevisiae</i>              |
|----------------------|---------------------|---------------------|-------------------------------------|-------------------------------------|-----------------------------------|
| Genome/Transcriptome | Accession           | NC_000913           | TAIR                                | GCF_000238955.2 <sup>1</sup>        | Ensembl                           |
|                      | Number of sequences | 1                   | 5                                   | 3555                                | 6713                              |
|                      | Size                | 4.6M                | 119.1M                              | 859.8M                              | 9.1M                              |
| Long reads           | Accession           | DevNet <sup>2</sup> | SRX533608:<br>SRR1284083-SRR1284086 | SRX985423:<br>SRR1960950-SRR2126010 | SRR2102571-<br>SRR2102572         |
|                      | Number of reads     | 75152               | 490418                              | 1307812                             | 199540                            |
|                      | Average length      | 2381                | 2645                                | 10082                               | 145                               |
|                      | Number of bases     | 179.0M              | 1297.6M                             | 13186.6M                            | 43.5M                             |
|                      | Coverage            | 39x                 | 11x                                 | 15x                                 | 5x                                |
|                      | Short reads         | Accession           | ERR022075 <sup>3</sup>              | ERR469286                           | SRX033046:<br>SRR077286-SRR077292 |
|                      | Number of reads     | 2.3M                | 50.5M                               | 298.4M                              | 9.9M                              |
|                      | Read length         | 101                 | 90                                  | 101                                 | 76                                |
|                      | Insert length       | 600                 | 451                                 | 101                                 | 240                               |
|                      | Number of bases     | 234.0M              | 4544.3M                             | 30138.0M                            | 1504.8M                           |
|                      | Coverage            | 51x                 | 38x                                 | 35x                                 | 165x                              |

<sup>1</sup> Scaffolds due to lack of complete genome<sup>2</sup> <https://github.com/PacificBiosciences/DevNet/wiki/E.-coli-Bacterial-Assembly><sup>3</sup> Subset of the accession

**Table S2** Running time and memory usage in the evaluation of error correction performance.

| Method                        | N Processes | N Threads | Running time (h)      | Memory usage (GB)    |
|-------------------------------|-------------|-----------|-----------------------|----------------------|
| <i>(a) On E. coli</i>         |             |           |                       |                      |
| PacBioToCA                    | 1           | 16        | 15.3                  | 9.3                  |
| LSC                           | 16          | 1         | 5.6                   | 14.0                 |
| Proovread                     | 4           | 4         | 16.3                  | 4.4                  |
| CoLoRMap                      | 1           | 16        | 5.8                   | 6.5                  |
| ECTools                       | 16          | 1         | 0.1 <sup>1</sup> +0.5 | $max\{3.9^1, 2.1\}$  |
| LoRDEC                        | 1           | 16        | 0.6                   | 0.8                  |
| Jabba                         | 1           | 16        | 0.1+0.1               | $max\{4.6, 0.5\}$    |
| HALC                          | 1           | 16        | 0.1+0.6               | $max\{3.9, 12.3\}$   |
| <i>(b) On A. thaliana</i>     |             |           |                       |                      |
| PacBioToCA                    | 1           | 16        | 152.0                 | 14.2                 |
| LSC                           | 16          | 1         | 184.6                 | 14.6                 |
| Proovread                     | 4           | 4         | 235.2                 | 2.1                  |
| CoLoRMap                      | 1           | 16        | 181.6                 | 36.3                 |
| ECTools                       | 16          | 1         | 0.6+182.2             | $max\{9.9, 2.1\}$    |
| LoRDEC                        | 1           | 16        | 6.2                   | 4.4                  |
| Jabba                         | 1           | 16        | 0.9+3.0               | $max\{100.0, 13.8\}$ |
| HALC                          | 1           | 16        | 0.6+6.4               | $max\{9.9, 41.2\}$   |
| <i>(c) On Maylandia zebra</i> |             |           |                       |                      |
| LoRDEC                        | 1           | 16        | 21.6                  | 14.1                 |
| HALC                          | 1           | 16        | 12.7+40.4             | $max\{33.7, 16.8\}$  |
| <i>(d) On S. cerevisiae</i>   |             |           |                       |                      |
| LSC                           | 16          | 1         | 1.6                   | 1.5                  |
| CoLoRMap                      | 1           | 16        | 5.6                   | 9.4                  |
| LoRDEC                        | 1           | 16        | 0.1                   | 2.0                  |
| Jabba                         | 1           | 16        | 0.4+0.1               | $max\{30.1, 0.5\}$   |
| HALC                          | 1           | 16        | 1.3+0.4               | $max\{15.1, 25.9\}$  |

<sup>1</sup> Additional time and memory of short read assemblies performed by SOAPdenovo2 for ECTools and HALC, or of preprocessing by Karet and Brownie for Jabba.
